# Supplementary material for: Entanglement of cation ordering and manipulation of the magnetic properties through a temperature-controlled topotactic interface reaction in nanocomposite perovskite oxides
Source: Royal Society of Chemistry journal article supplement (doi:10.1039/d3ma00891f), 2024-01-01
Supplement: d3ma00891f1.pdf [file d3ma00891f1.pdf]

## Electronic Supplementary Materials

# Entanglement of cation ordering and manipulation of the magnetic properties through temperature controlled topotactic interface reaction in nanocomposite perovskite oxides

Sudipa Bhattacharya<sup>1</sup>, Radhamadhab Das<sup>1</sup>, Shreyashi Chowdhury<sup>1</sup>, Supin K K<sup>2,3</sup>, M. Vasundhara<sup>2,3\*</sup>, Jyoti Ranjan Sahu<sup>4</sup>, Trilochan Bhunia<sup>5</sup>, Arup Gayen<sup>5</sup>, Oleg I. Lebedev<sup>6</sup> and Md. Motin Seikh<sup>1,\*</sup>

<sup>1</sup>*Department of Chemistry, Visva-Bharati University, Santiniketan–731235, West Bengal, India*

<sup>2</sup>*Polymers and Functional Materials Department, CSIR-Indian Institute of Chemical Technology, Hyderabad-500007, India*

<sup>3</sup>*Academy of Scientific and Innovative Research (AcSIR), Ghaziabad-201002, India.*

<sup>4</sup>*P.G. Department of Physics, Maharaja Sriram Chandra Bhanja Deo University, Baripada-757003, India*

<sup>5</sup>*Department of Chemistry, Jadavpur University, Kolkata 700032, India*

<sup>6</sup>*Laboratoire CRISMAT, ENSICAEN UMR6508, 6 Bd Maréchal Juin, Cedex 4, Caen-14050, France*

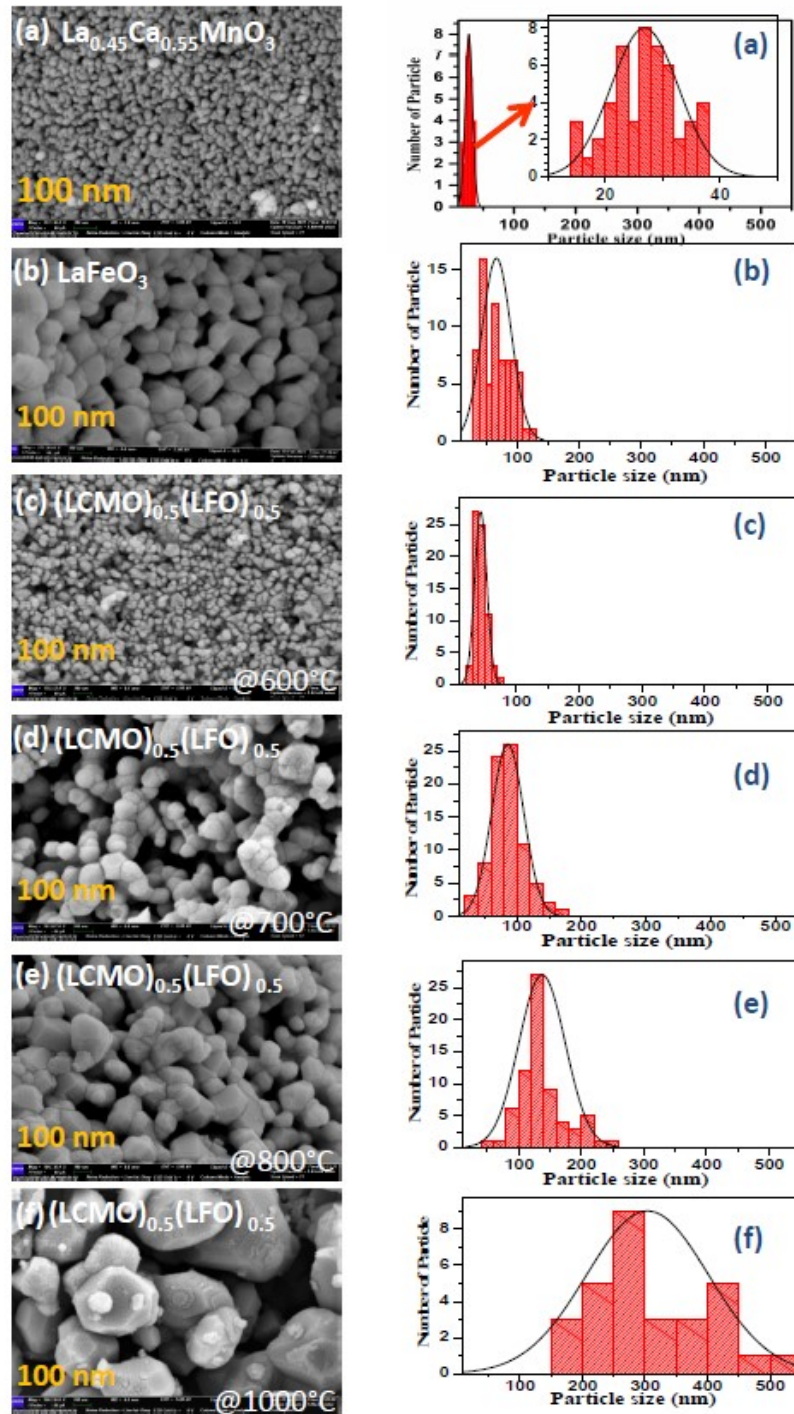

**Fig. S1:** FE-SEM images and particle size histogram for (a)  $\text{La}_{0.45}\text{Ca}_{0.55}\text{MnO}_3$  (LCMO), (b)  $\text{LaFeO}_3$  (LFO), (c) LCMO-LFO annealed at  $600^\circ\text{C}$ , (d) LCMO-LFO annealed at  $700^\circ\text{C}$ , (e) LCMO-LFO annealed at  $800^\circ\text{C}$  and (f) LCMO-LFO annealed at  $1000^\circ\text{C}$ .

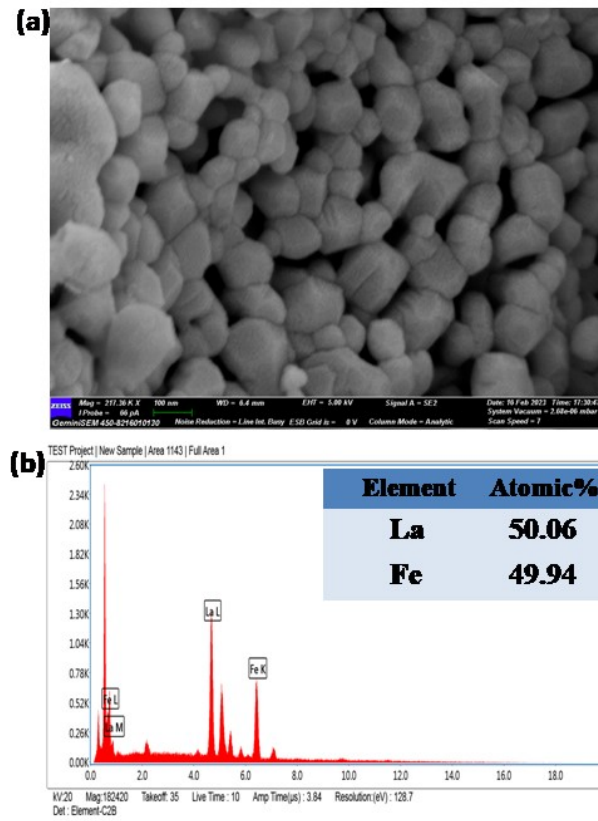

**Fig. S2:** (a) FE-SEM image of LaFeO<sub>3</sub> (LFO) and (b) EDX spectrum and cationic ratio.

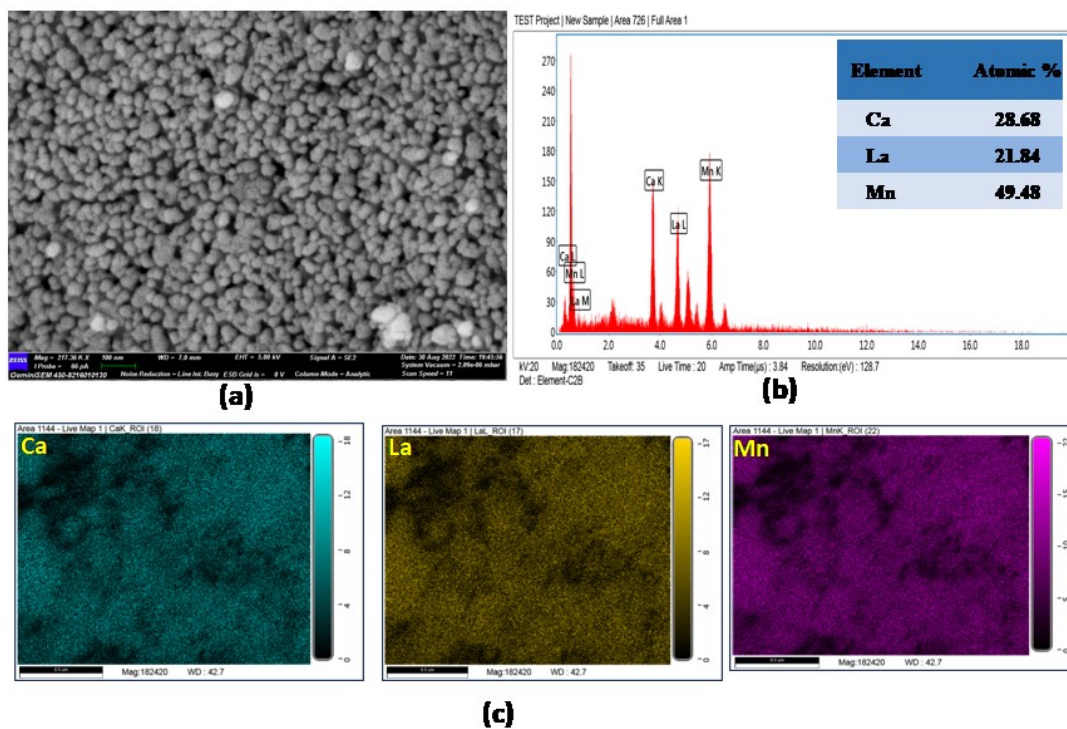

**Fig. S3:** (a) FE-SEM image of  $\text{La}_{0.45}\text{Ca}_{0.55}\text{MnO}_3$  (LCMO), (b) EDX spectrum and cationic ratio, and (c) elemental mapping for the cations.

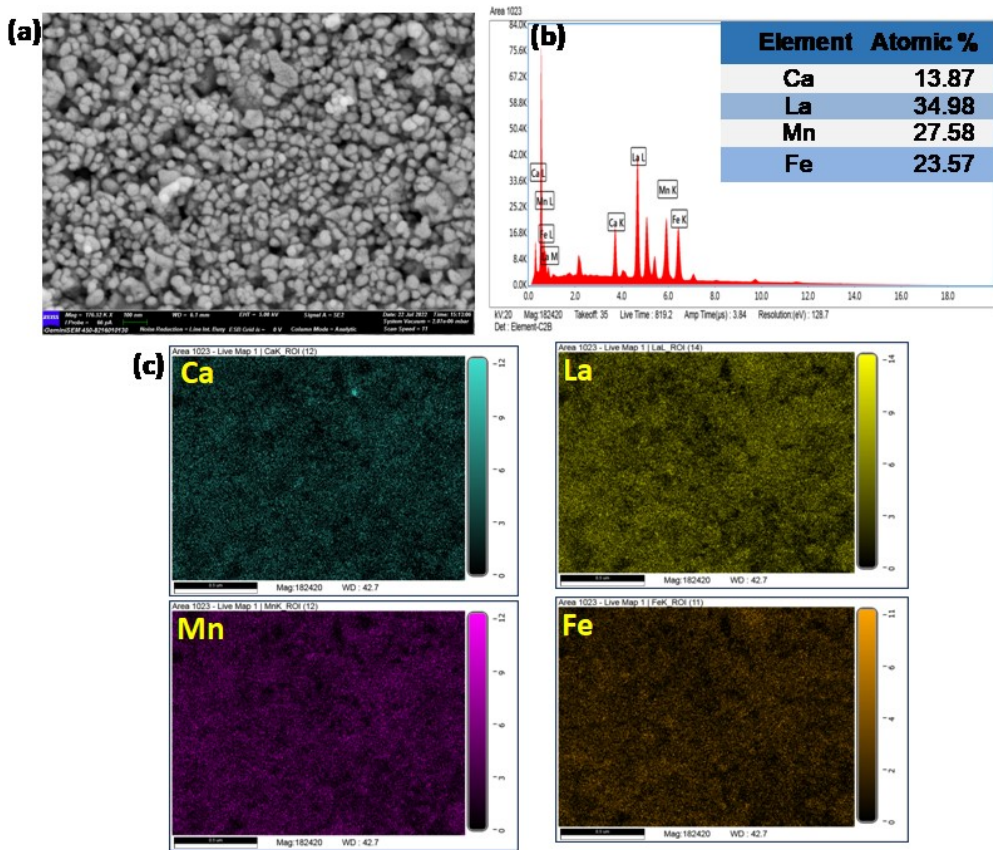

**Fig. S4:** (a) FE-SEM image of  $\text{La}_{0.45}\text{Ca}_{0.55}\text{MnO}_3\text{-LaFeO}_3$  (LCMO-LFO) composite annealed at 600 °C, (b) EDX spectrum and cationic ratio, and (c) elemental mapping for the cations.

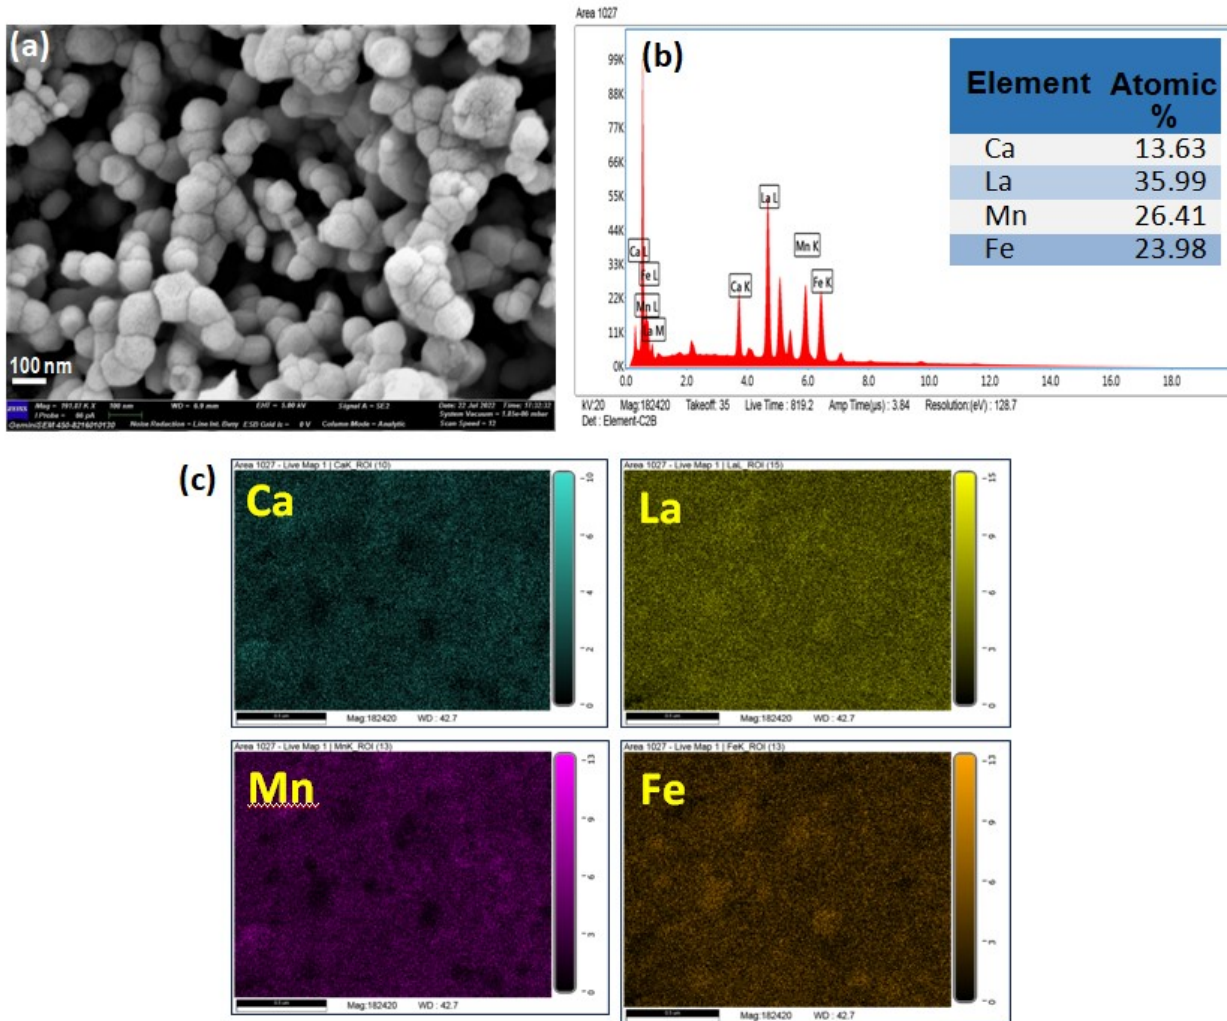

**Fig. S5:** (a) FE-SEM image of  $\text{La}_{0.45}\text{Ca}_{0.55}\text{MnO}_3\text{-LaFeO}_3$  (LCMO-LFO) composite annealed at  $700\text{ }^\circ\text{C}$ , (b) EDX spectrum and cationic ratio, and (c) elemental mapping for the cations.

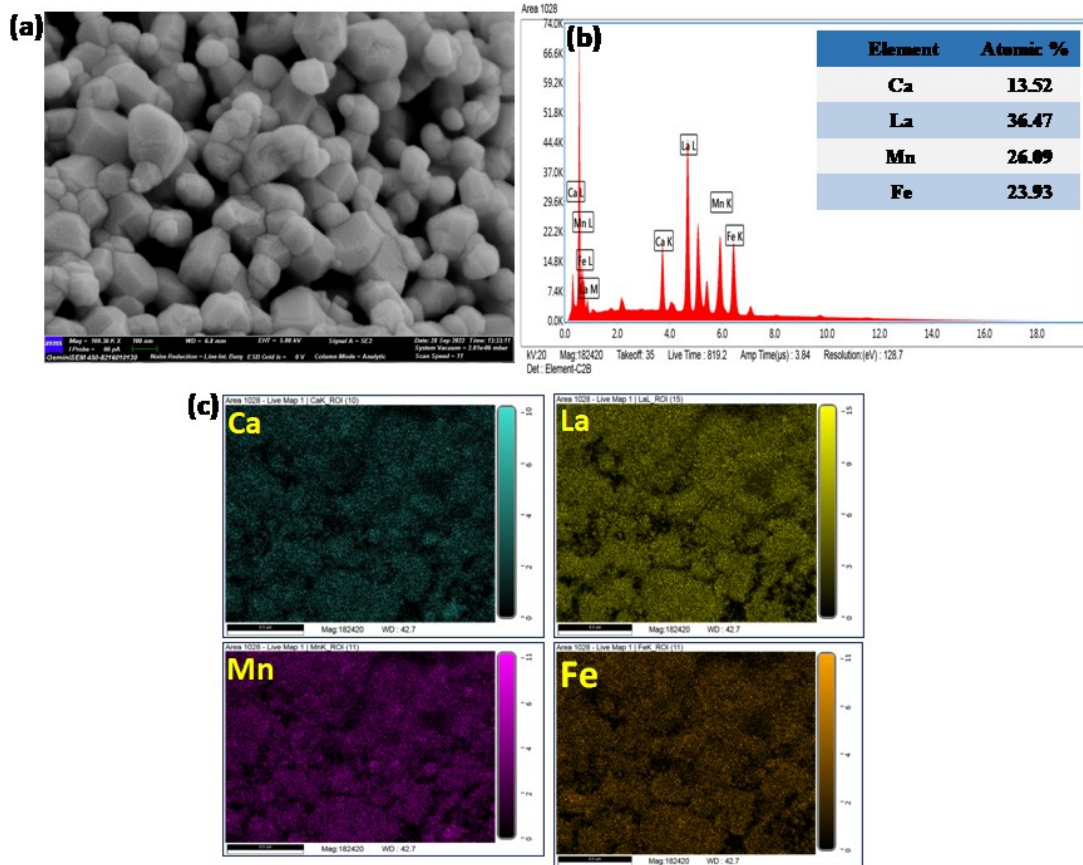

**Fig. S6:** (a) FE-SEM image of  $\text{La}_{0.45}\text{Ca}_{0.55}\text{MnO}_3\text{-LaFeO}_3$  (LCMO-LFO) composite annealed at 800 °C, (b) EDX spectrum and cationic ratio, and (c) elemental mapping for the cations.

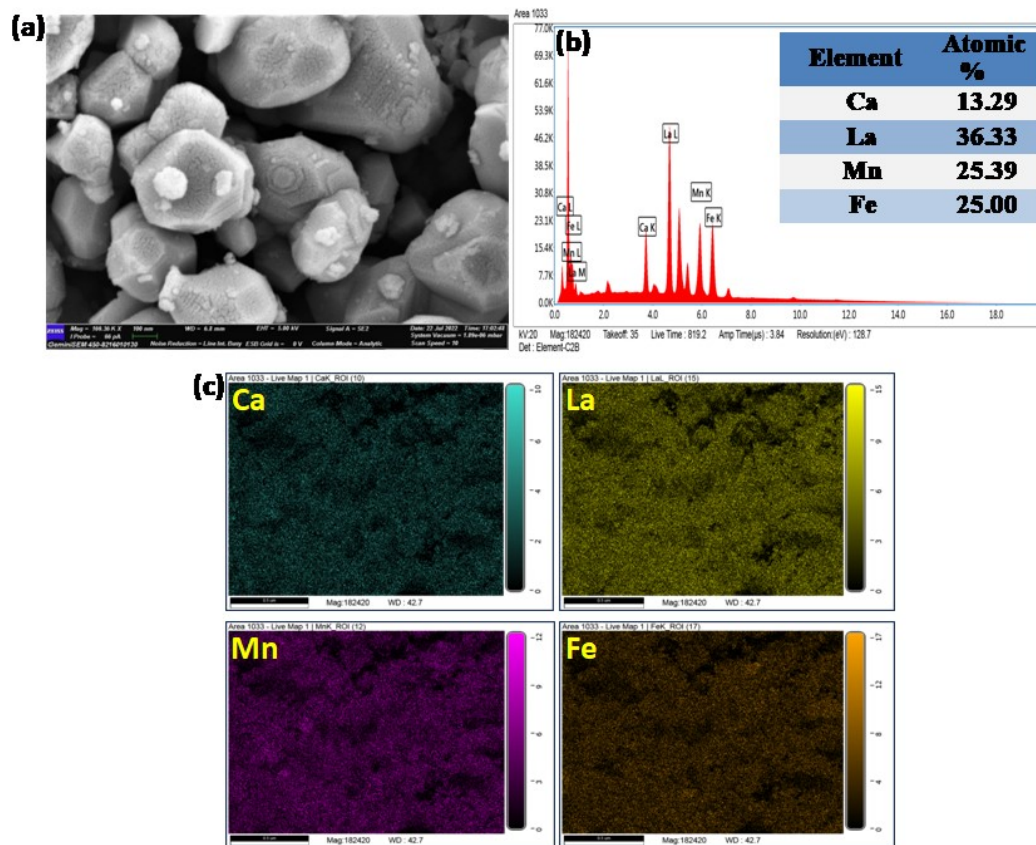

**Fig. S7:** (a) FE-SEM image of  $\text{La}_{0.45}\text{Ca}_{0.55}\text{MnO}_3\text{-LaFeO}_3$  (LCMO-LFO) composite annealed at  $1000\text{ }^\circ\text{C}$ , (b) EDX spectrum and cationic ratio, and (c) elemental mapping for the cations.

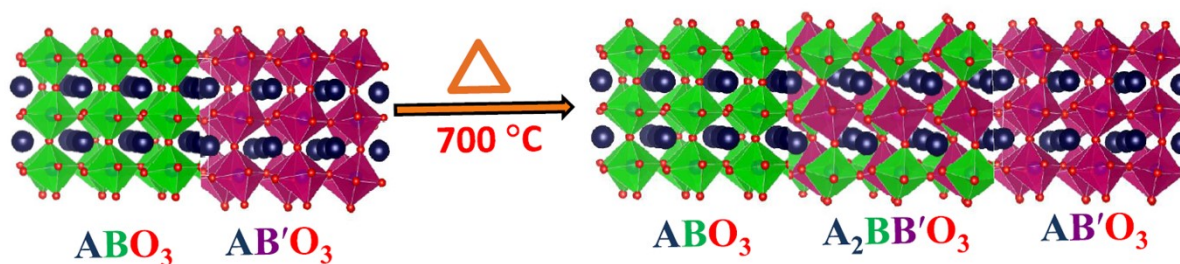

**Fig. S8:** Schematic view of cation ordering across the interface of grain boundary of two different perovskites via controlled thermal treatment.



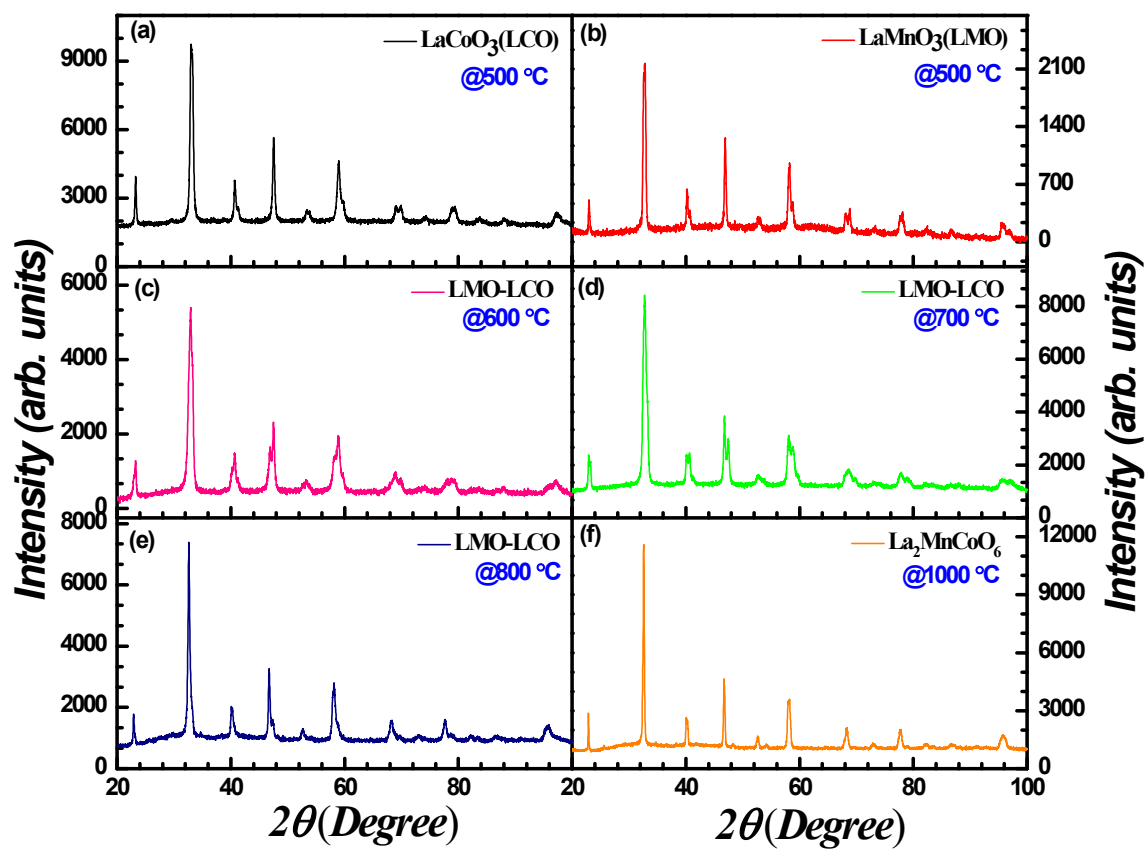

**Fig. S9:** Powder X-ray diffraction patterns of (a)  $\text{LaCoO}_3$  (LCO), (b)  $\text{LaMnO}_3$  (LMO) and LMO-LCO composite annealed at: (c) 600 °C, (d) 700 °C, (e) 800 °C and (f) 1000 °C.
